# Supplementary material for: Flamingo regulates epiboly and convergence/extension movements through cell cohesive and signalling functions during zebrafish gastrulation
Source: Oxford University Press journal article supplement (doi:10.1242/dev.026542), 2008-12-18
Supplement: dev026542-sup-026542-tables2.pdf [file dev026542-sup-026542-tables2.pdf]

**Table S2. Rescue experiment of the *celsr* mutant/morphant epiboly phenotype with Celsr-ΔN**

| Genotype     | MO                   | Celsr-ΔN-Venus RNA<br>(ng) | Epiboly (%) | <i>n</i> |
|--------------|----------------------|----------------------------|-------------|----------|
| <i>MZord</i> | <i>celsr1a/1b</i> MO | –                          | 69          | 32       |
| <i>MZord</i> | <i>celsr1a/1b</i> MO | 0.05                       | 70          | 74       |
| <i>MZord</i> | <i>celsr1a/1b</i> MO | 0.1                        | 72          | 60       |

Epiboly phenotypes are defined by retraction of deep cells from the leading edge of the YSL using β-catenin antibody. The amount of MO injected was 0.4 pmoles each.
